# Supplementary material for: An investigation of Cu–Re–ZnO catalysts for the hydrogenolysis of glycerol under continuous flow conditions
Source: Royal Society of Chemistry journal article supplement (doi:10.1039/c7se00199a), 2017-01-01
Supplement: c7se00199a1.pdf [file c7se00199a1.pdf]

## Supplementary materials

### **An investigation of Cu-Re-ZnO catalysts for the hydrogenolysis of glycerol under flow conditions**

**Mzamo L. Shoji<sup>a</sup>, Venkata D.B.C. Dasireddy<sup>a</sup>, Sooboo Singh<sup>a</sup>, Pheladi Mohlala<sup>b</sup>, David J. Morgan<sup>c</sup>, Sarwat Iqbal<sup>c</sup> and Holger B. Friedrich<sup>a\*</sup>**

<sup>a</sup>School of Chemistry and Physics, University of KwaZulu-Natal, Durban, 4000, South Africa

<sup>b</sup>Sasol Technology R&D, 1 Klasie Havenga Street, Sasolburg, 1974, South Africa

<sup>c</sup>Cardiff Catalysis Institute, Cardiff University, Main Building, Park Place, Cardiff, CF10 3AT, United Kingdom

---

\* To whom correspondence should be addressed: Email: [friedric@ukzn.ac.za](mailto:friedric@ukzn.ac.za)

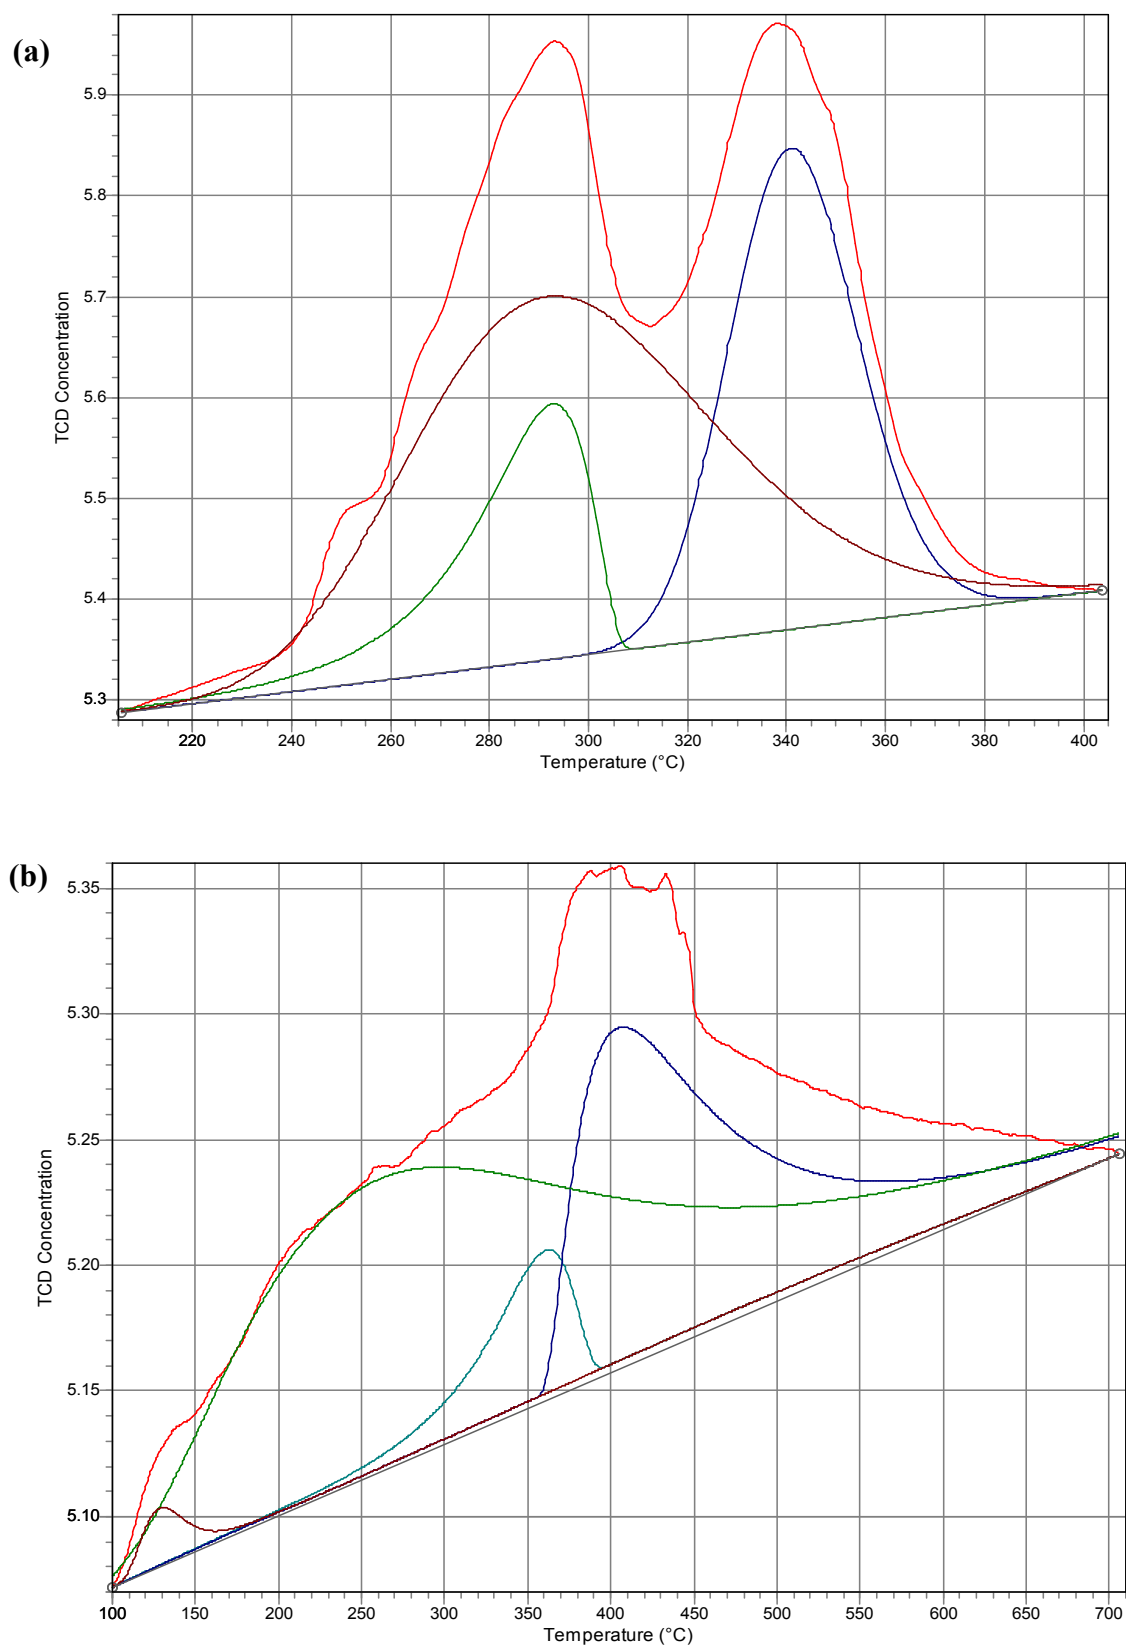

**Figure S1.** Deconvolution of the TPR profiles of (a) Cu/ZnO and (b) Re/ZnO in order to determine reduction temperatures.

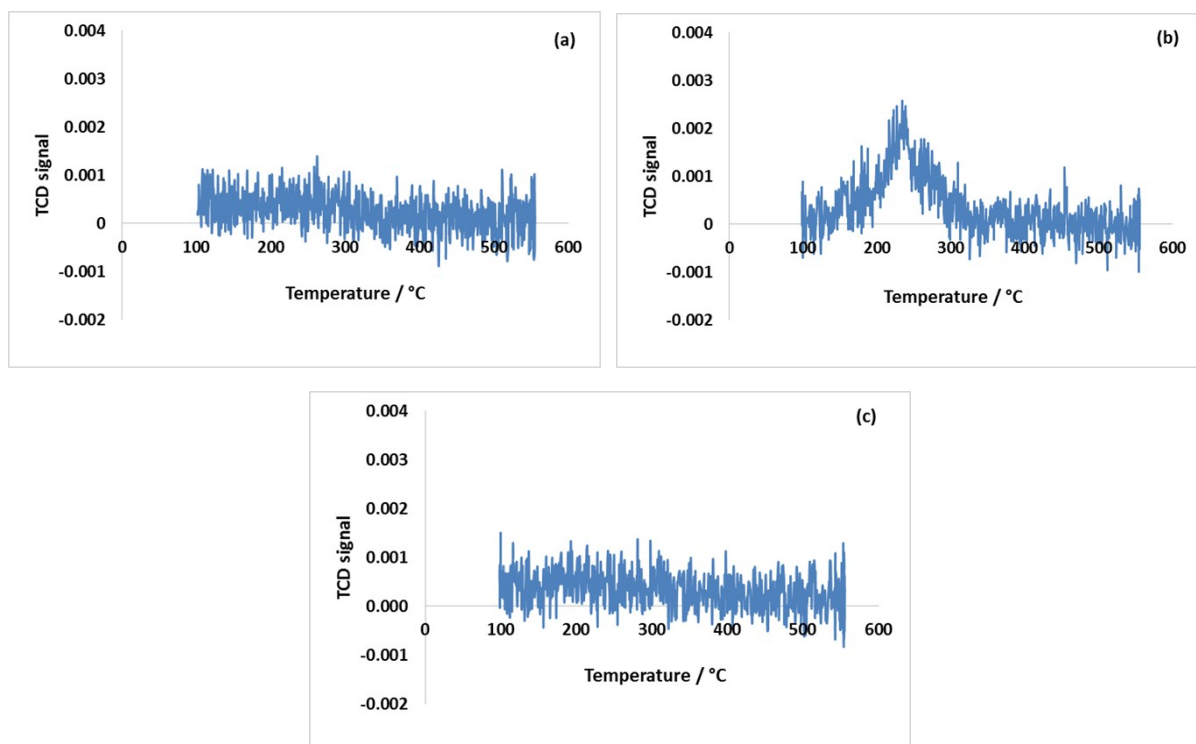

**Figure S2.** TPD profiles of (a) Cu/ZnO, (b) Re/ZnO and (c) Re-Cu/ZnO. The mass spectrometer is calibrated in order to obtain quantitative data. This is achieved by injecting a known volume of the gas to be detected (propylene),  $V_{cal}$  through the septum. The peak area,  $A_{cal}$  of the mass spectrometer signal for propylene can be obtained from the AutoChem peak-editing software. The ratio of ( $V_{cal}/A_{cal}$ ) can be used as a calibration factor for the calculations of Brønsted acid sites concentrations,  $N_{as}$ , using the formula below:

$$N_{as} = A_{pms} \left( \frac{V_{cal}}{A_{cal}} \right) \left( \frac{L}{10^3 \text{ cc}} \right) \left( \frac{\text{mole}}{22.414 \text{ L@STP}} \right) \left( \frac{10^6 \mu\text{moles}}{\text{mole}} \right)$$

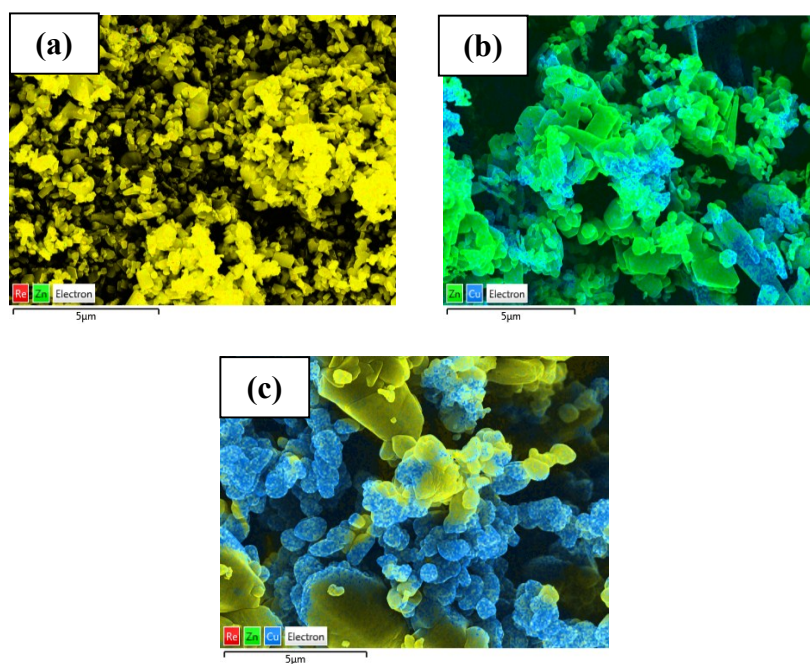

**Figure S3.** SEM-EDX images of (a) ReO<sub>x</sub>/ZnO, (b) CuO/ZnO and (c) Re-CuO/ZnO

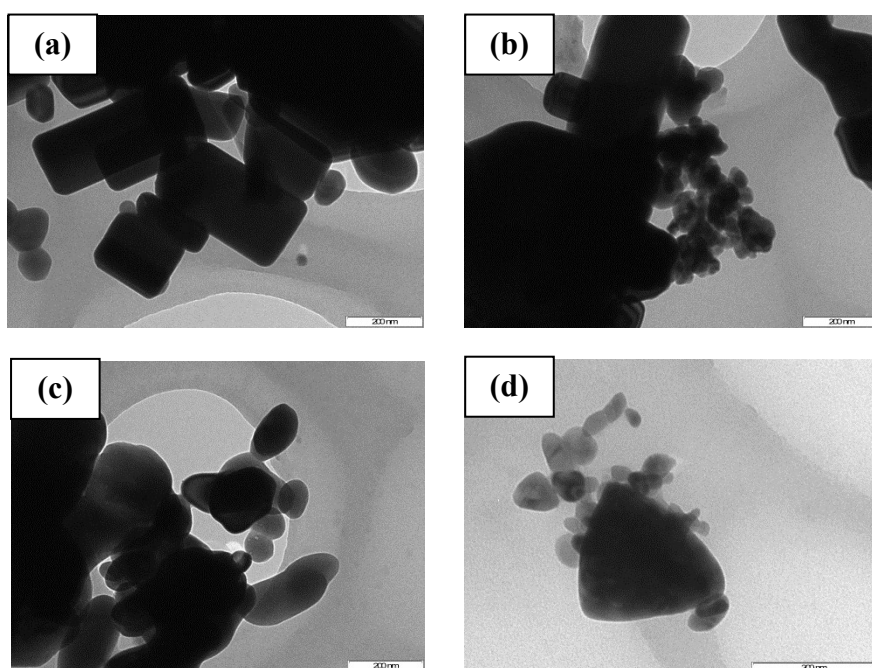

**Figure S4.** TEM images of (a) ZnO, (b)  $\text{ReO}_x/\text{ZnO}$ , (c)  $\text{CuO}/\text{ZnO}$  and (d)  $\text{Re-CuO}/\text{ZnO}$

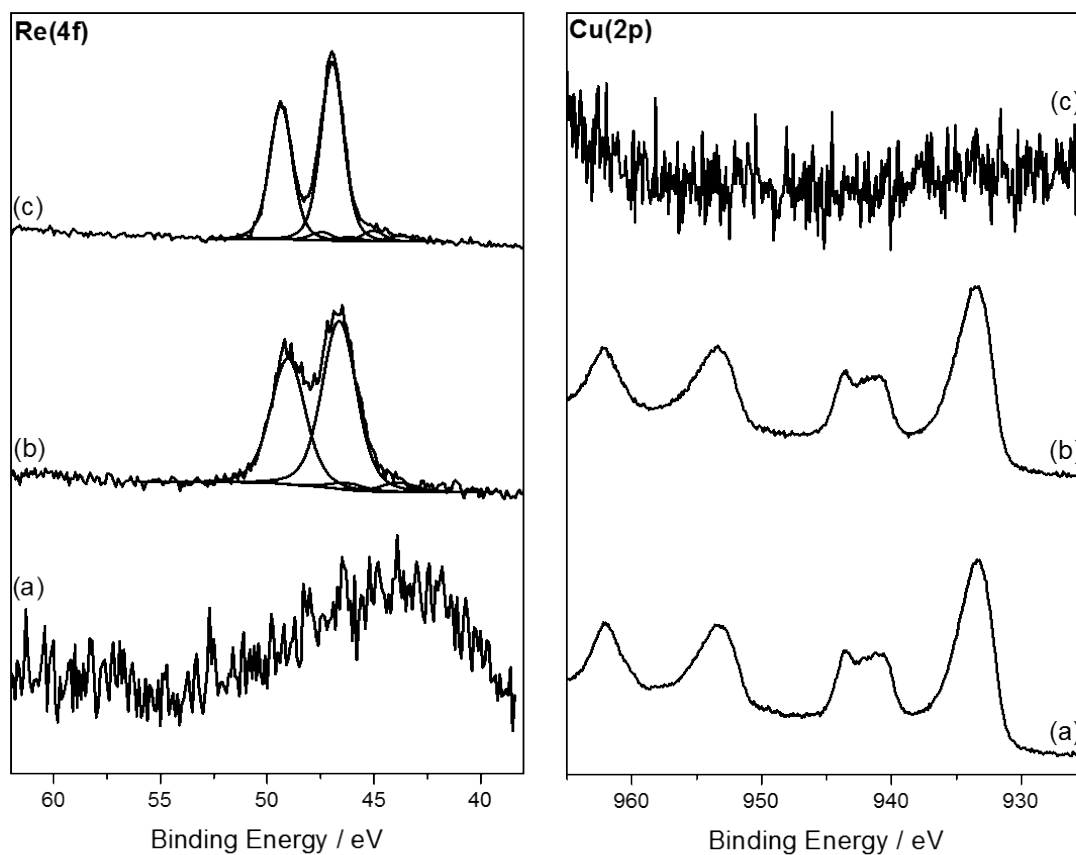

**Figure S5.** The Re(4f) and Cu(2p) core-level spectra for the catalysts: (a) CuO/ZnO, (b) Re-CuO/ZnO and (c) ReO<sub>x</sub>/ZnO. Cu is Cu(2+) oxide, whilst Re is predominantly Re(7+) (Re<sub>2</sub>O<sub>7</sub>). The small lower peaks come from reduction under x-ray beam.

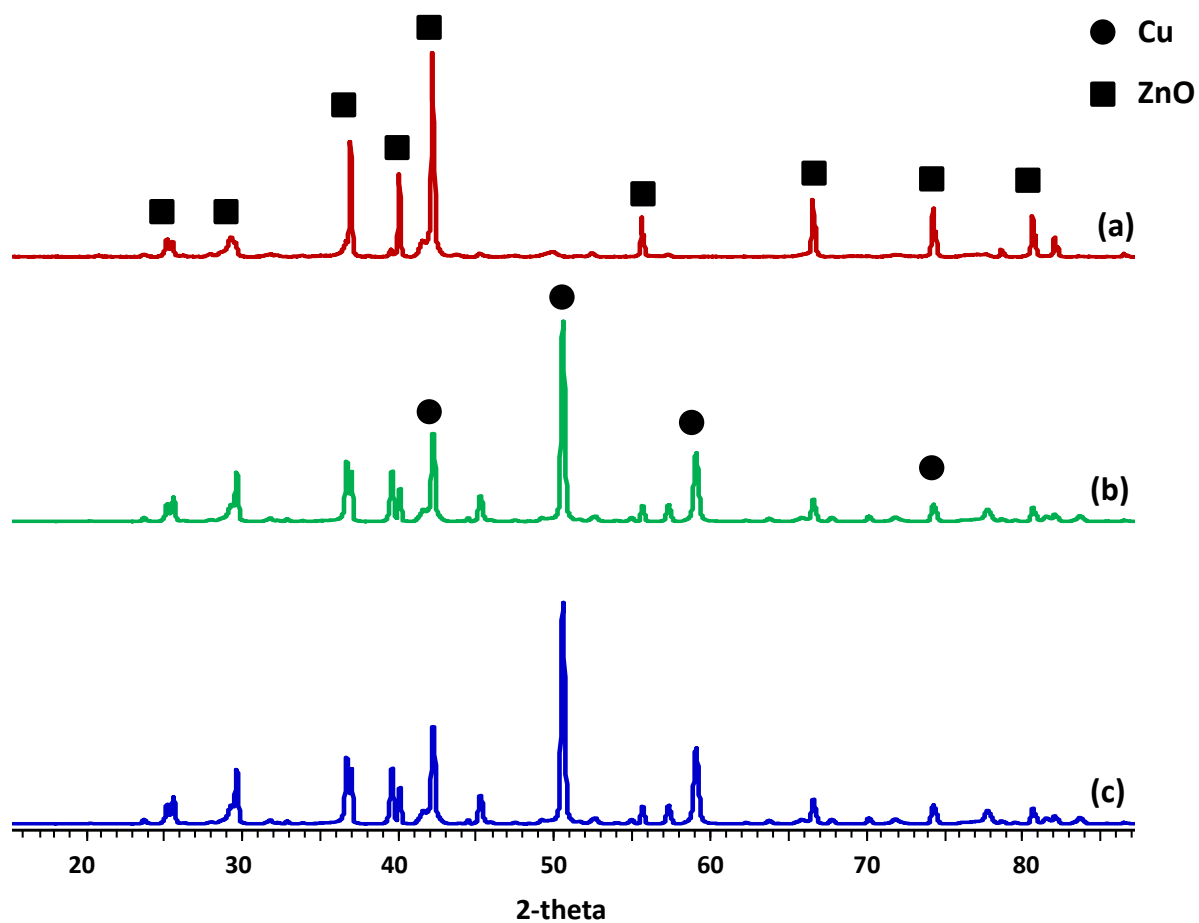

**Figure S6.** XRD diffractograms of spent catalysts (a) Re/ZnO, (b) Cu/ZnO and (c) Re-Cu/ZnO.
